# Supplementary material for: SMYD2 targets RIPK1 and restricts TNF-induced apoptosis and necroptosis to support colon tumor growth
Source: PubMed Central journal article supplement (PMC8755774; doi:10.1038/s41419-021-04483-0), 2022-01-12
Supplement: 41419_2021_4483_MOESM2_ESM.pdf [file 41419_2021_4483_MOESM2_ESM.pdf]

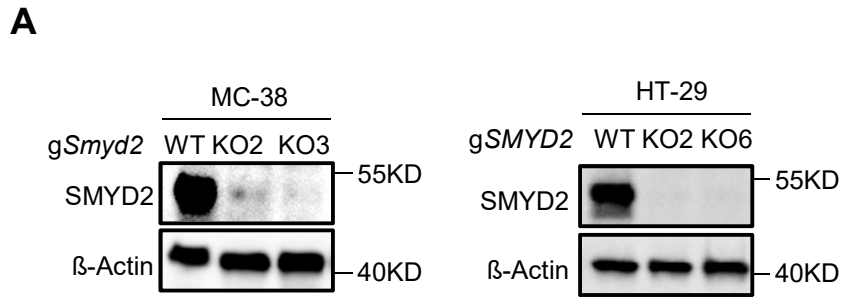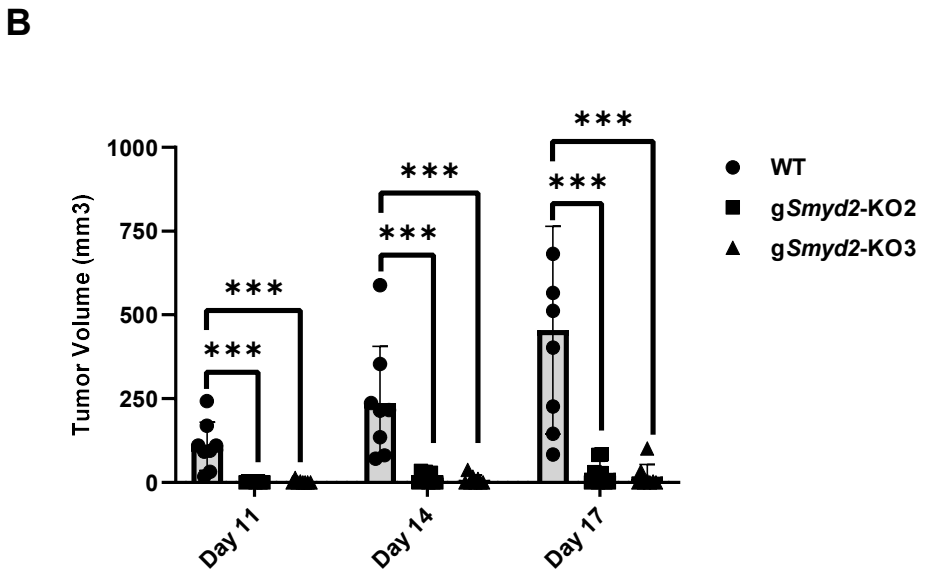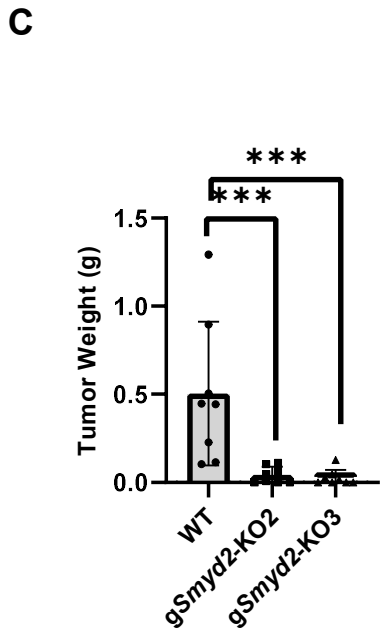

S-Fig.1
