# Supplementary material for: SMYD2 targets RIPK1 and restricts TNF-induced apoptosis and necroptosis to support colon tumor growth
Source: PubMed Central journal article supplement (PMC8755774; doi:10.1038/s41419-021-04483-0), 2022-01-12
Supplement: 41419_2021_4483_MOESM5_ESM.pdf [file 41419_2021_4483_MOESM5_ESM.pdf]

**Figure 1**

**Fig 1C**

1.1 1.0 0.9 1.5 1.9 2.4

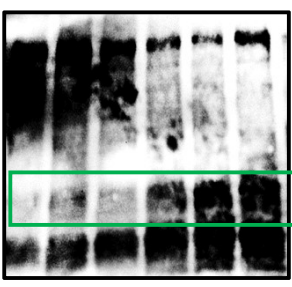

55KD

SMYD2

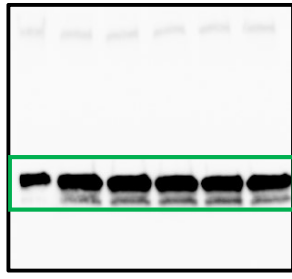

40KD

beta-Actin

0.9 0.8 1.2 1.0 2.6 1.7 2.5 2.5

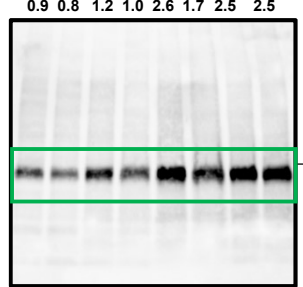

55KD

SMYD2

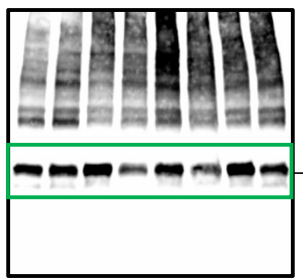

40KD

beta-Actin

**Figure 2**

**Fig 2A**

1.0 0.9 0.9

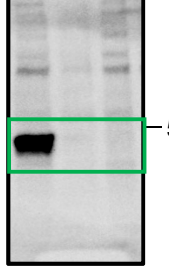

55KD

SMYD2

1.0 0.9 0.9

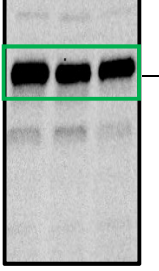

100KD

beta catenin

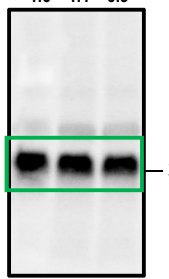

35KD

Cyclin D1

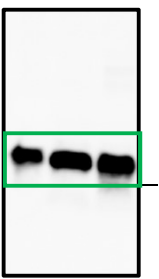

40KD

beta-Actin

**Fig 2C**

1.0 1.1 1.3

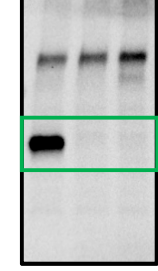

55KD

SMYD2

1.0 1.1 1.3

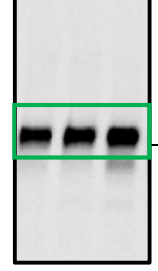

100KD

beta catenin

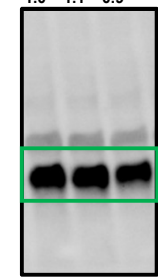

35KD

Cyclin D1

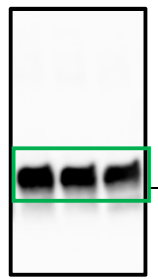

40KD

beta-Actin

**Figure 3**

**Fig 3F**

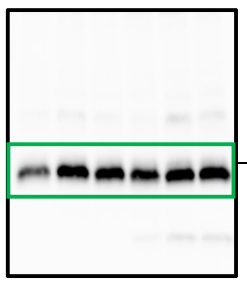

35KD

Casp 3

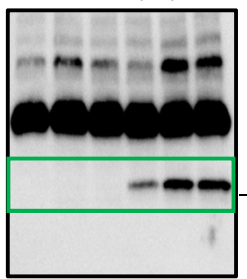

15KD

CI-Casp 3

**Fig 3F**

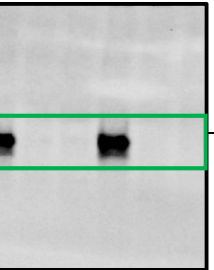

55KD

SMYD2

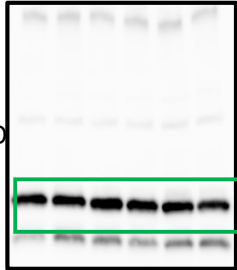

40KD

beta-Actin

1.0 3.7 4.3

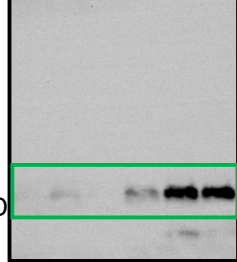

25KD

HMGB1

1.0 4.3 3.6

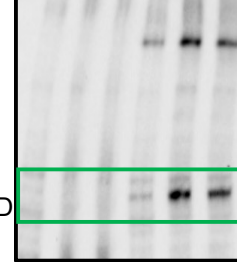

55KD

pMLKL

MLKL trimer: 1.0 2.0 2.1

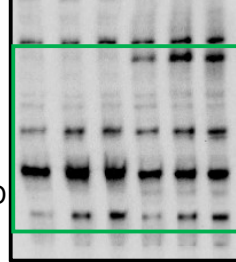

130KD

100KD

70KD

55KD

MLKL

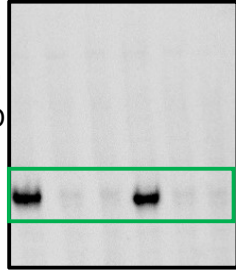

55KD

SMYD2

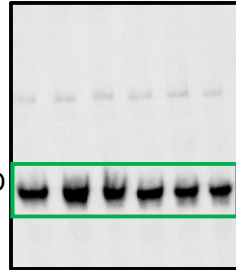

40KD

beta-Actin

**Fig 3H**

**S-Fig.4: Full length blots and quantification**

**Figure 4**

**Fig 4A**

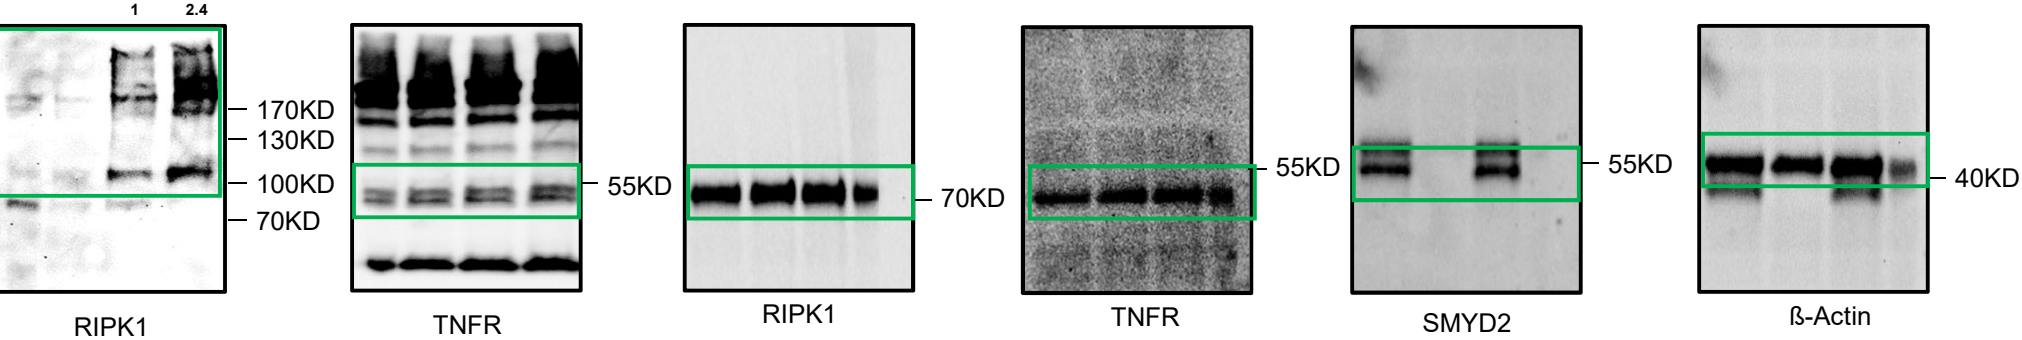

**Fig 4B**

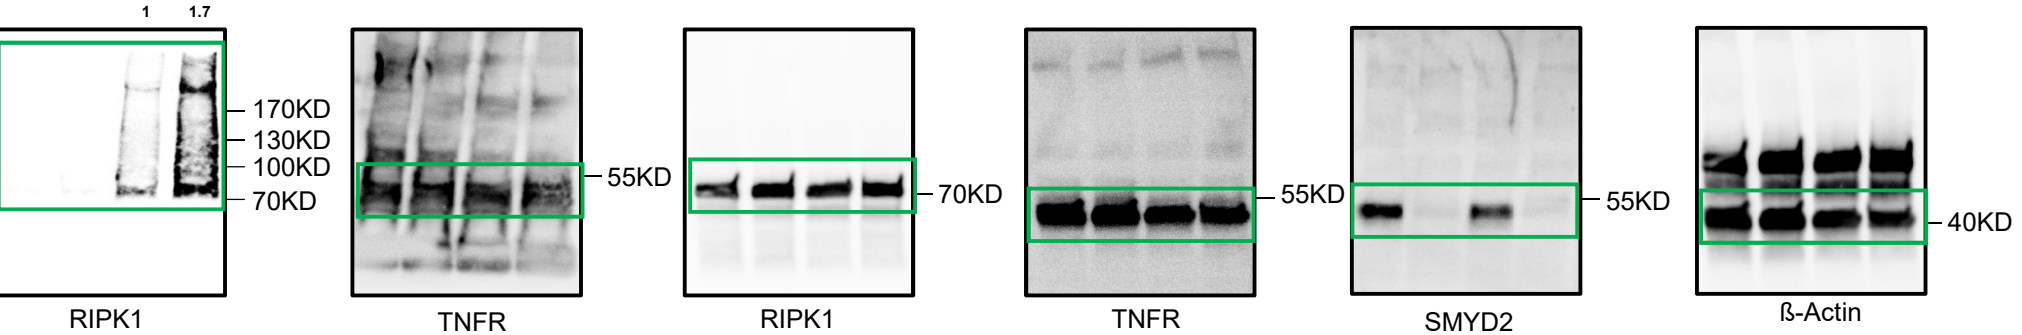

**Fig 4C**

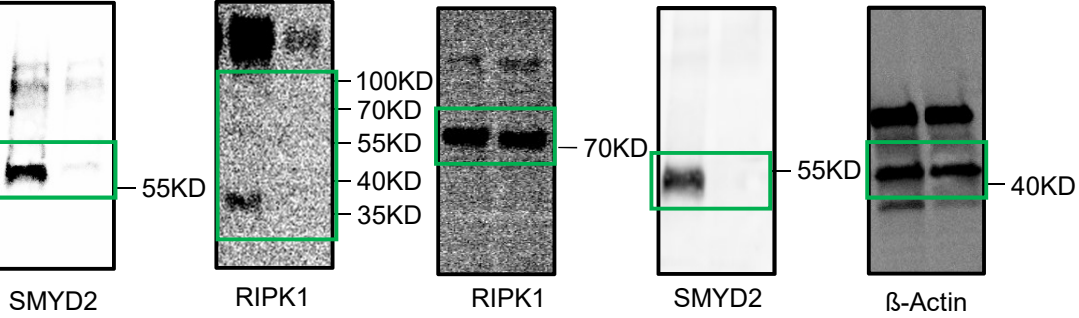

**Fig 4D**

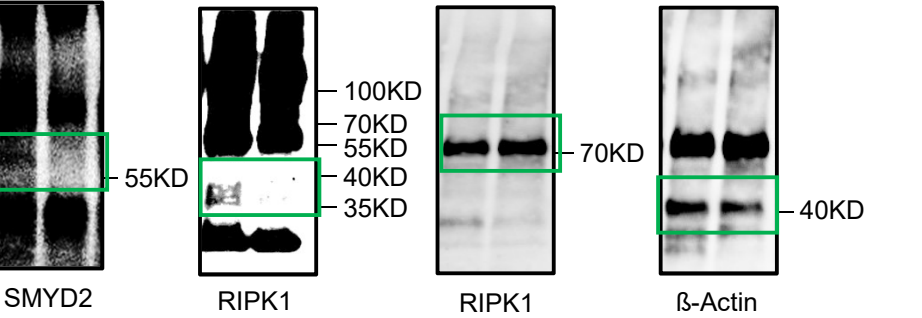

S-Fig.4: Full length blots and quantification

**Figure 4**

**Fig 4E**

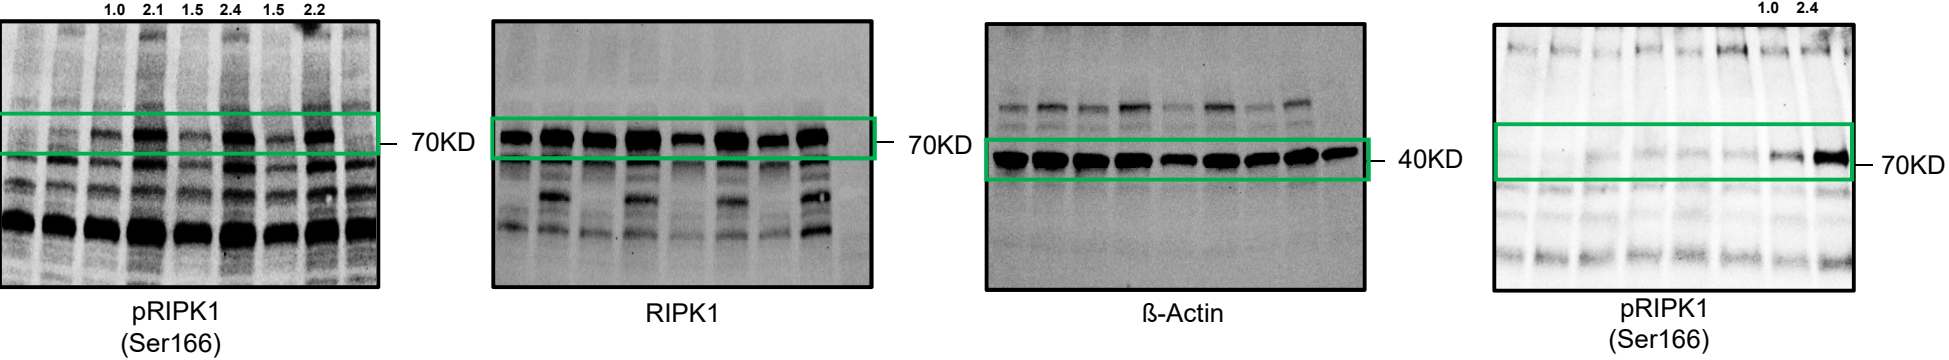

S-Fig.1A

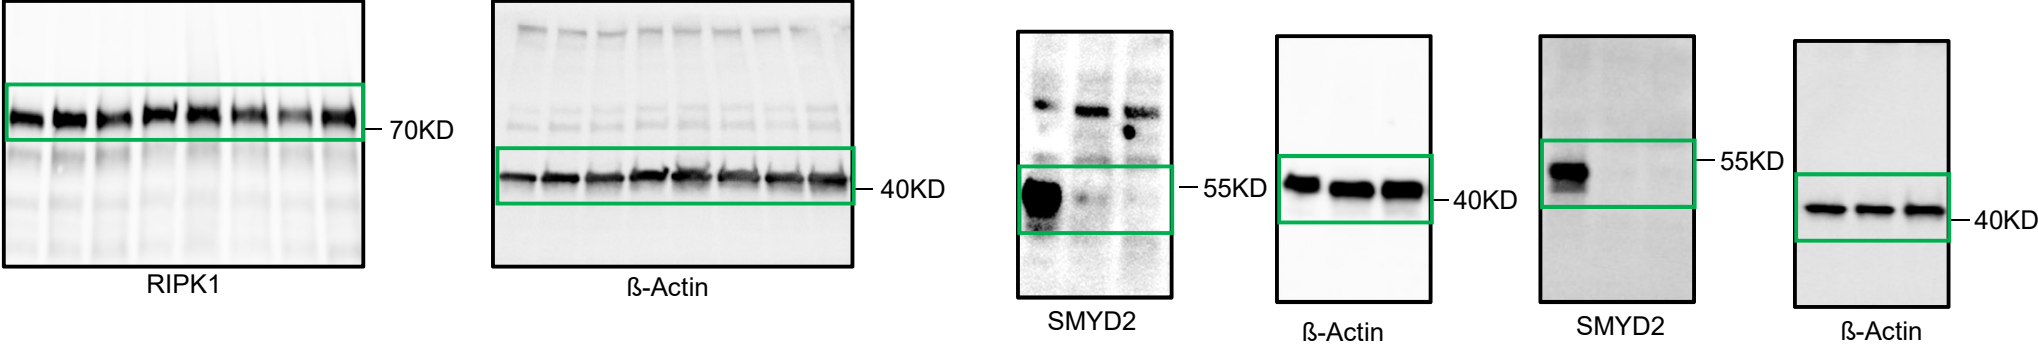

S-Fig.2G

S-Fig.3A

S-Fig.3C

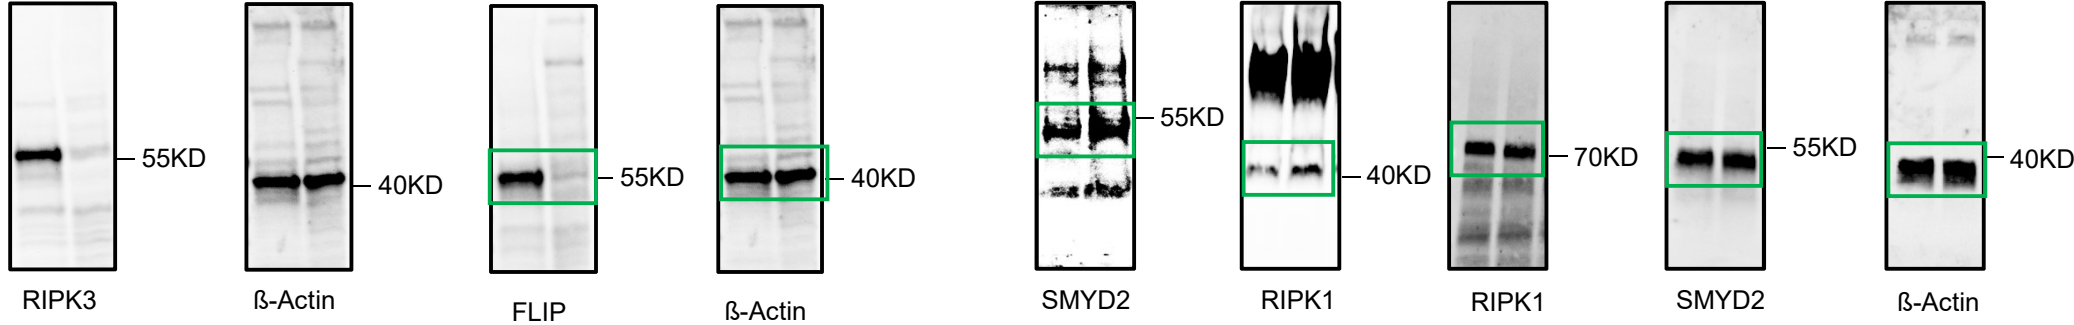

S-Fig.4: Full length blots and quantification
